# Supplementary material for: Beta blockers versus calcium channel blockers for provocation of vasospastic angina after drug-eluting stent implantation: a multicentre prospective randomised trial
Source: HighWire-hosted journal article supplement (doi:10.1136/openhrt-2020-001406), 2020-10-01
Supplement: openhrt-2020-001406supp001_data_supplement.pdf [file openhrt-2020-001406supp001_data_supplement.pdf]

## Supplemental Material

Supplemental Table 1. Detailed locations of PCI lesions

Supplemental Table 2. Patient and treatment status at 9 months

Supplemental Table 3. Adjusted odds ratios for the primary endpoint

Supplemental Table 1. Detailed locations of PCI lesions

| Lesion |      | BB (N = 26) | CCB (N = 26) |
|--------|------|-------------|--------------|
| RCA    | #1   |             | 1            |
|        | #2   |             | 0            |
|        | #3   | 7           | 2            |
|        | #4AV |             | 0            |
|        | #4PD |             | 0            |
| LAD    | #5   |             | 0            |
|        | #6   |             | 11           |
|        | #7   | 18          | 6            |
|        | #8   |             | 21           |
|        | #9   |             | 2            |
|        | #10  |             | 0            |
| LCX    | #11  |             | 1            |
|        | #12  |             | 1            |
|        | #13  | 5           | 8            |
|        | #14  |             | 1            |
|        | #15  |             | 0            |

RCA= right coronary artery; LAD=left anterior descending; LCX=left circumflex;  
 N=number of patients; AV=atrioventricular; PD= posterior descending

Supplemental Table 2. Patient and treatment status at 9 months

| Number of patients                        | Overall |      | BB   |      | CCB  |      | <i>P</i> value |
|-------------------------------------------|---------|------|------|------|------|------|----------------|
|                                           | 52      |      | 26   |      | 26   |      |                |
| Systolic blood pressure (mmHg) mean (SD)  | 125     | 18.4 | 122  | 18.4 | 128  | 18.3 | 0.28           |
| Diastolic blood pressure (mmHg) mean (SD) | 75      | 12.5 | 72   | 12.9 | 78   | 11.5 | 0.07           |
| Heart rate (bpm)                          | 72      | 12.3 | 67   | 12.0 | 76   | 11.0 | 0.007          |
| Beta-blocker                              | 52%     | 27   | 93%  | 24   | 12%  | 3    |                |
| Carvedilol                                | 1.9%    | 1    | 3.9% | 1    | 3.9% | 1    | <0.001         |
| Bisoprolol                                | 50%     | 26   | 89%  | 23   | 7.7% | 2    |                |
| Calcium-channel blocker*                  | 54%     | 28   | 15%  | 4    | 92%  | 24   | <0.001         |

Values are mean \_ SD or n (%).

SD=standard deviation; bpm=beat per minute

\* = Amlodipine

Supplemental Table 3. Adjusted odds ratios for the primary endpoint

|               | CCB (N = 26) | BB (N = 26)                            |
|---------------|--------------|----------------------------------------|
|               |              | Odds ratio (95% CI)                    |
| Model 1       | Reference    | 0.670 [-4.30, 3.49]                    |
| Previous MI   | Reference    | 3.20 * 10 <sup>^(-8)</sup> [-inf, inf] |
| Previous PCI  | Reference    | 2.00 [-8.09, 9.48]                     |
| Previous CABG | Reference    | 0.735 [-inf, inf]                      |
| Model 2       | Reference    | 0.632 [-0.435, 3.43]                   |
| Previous PCI  | Reference    | 0.500[-7.36, 5.98]                     |

Inf= infinite; CCB=calcium channel blocker; BB= beta blocker; N=number of patients
